# Supplementary material
Source: Springer Nature journal article supplement (https://www.springermedizin.de/resource/supplementary/12885_2013_4274_MOESM7_ESM.pdf/9467110)

Included studies by sample size

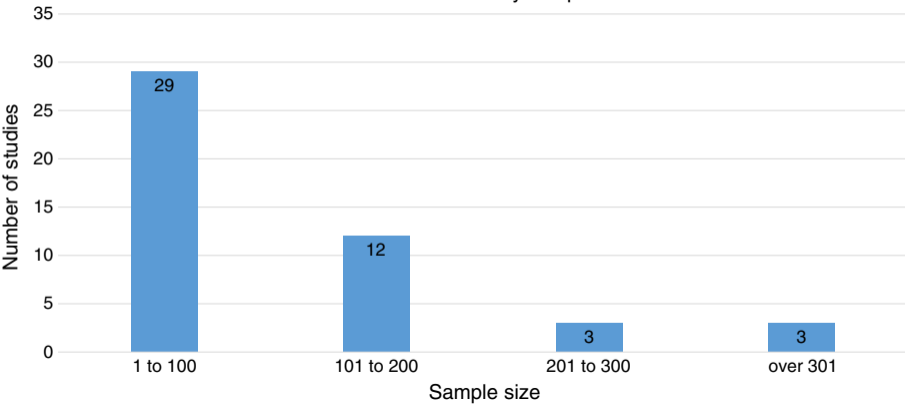

Supplement: MOESM7 [file 9467110]
